# Supplementary material for: Understanding controls on the geochemistry of hydrocarbon produced waters from different basins across the US
Source: Royal Society of Chemistry journal article supplement (doi:10.1039/d0em00388c), 2020-12-15
Supplement: d0em00388c1.xlsx [file d0em00388c1.xlsx]

## Sheet: Sheet1
BASIN	FORMATION	ERA	PERIOD	Units	TDSUSGS	Br	Ca	Cl	Cl/Br	K	Mg	Na	Na/Br	Ca+Mg+Na+K	SO4	Sr	1/Sr	dD	d18O	Sr87Sr86	ẟD	ẟ18O	states LMWL	LITHOLOGY	WELLTYPE
Michigan	Trenton	Paleozoic	Ordovician	mg/L	139500	460	9900	87000	189.13	1840	3700	36000	78.2609	51440	66	520	0.00192308	-28	-3	0.70929	-72.2	-10.55	Michigan	Carbonate	Conventional Hydrocarbon
Michigan	Trenton	Paleozoic	Ordovician	mg/L	140900	440	10800	87000	197.727	1850	3900	36000	81.8182	52550	66	500	0.002	-28	-2.8	0.70938	-74.2	-10.88	Michigan	Carbonate	Conventional Hydrocarbon
Michigan	Trenton	Paleozoic	Ordovician	mg/L	160900	510	13100	102000	200	2000	3700	39000	76.4706	57800	420	470	0.00212766	-26	-2.7	0.70958	-68.7	-10.16	Michigan	Carbonate	Conventional Hydrocarbon
Michigan	Trenton	Paleozoic	Ordovician	mg/L	142100	460	10500	88000	191.304	1880	3700	38000	82.6087	54080		570	0.00175439	-28	-2.6	0.70929	-68.2	-10.06	Michigan	Carbonate	Conventional Hydrocarbon
Michigan	Trenton	Paleozoic	Ordovician	mg/L	208700	790	25000	132000	167.089	3300	4700	42000	53.1646	75000	510	480	0.00208333	-34	-2.4	0.70994	-76.9	-11.23	Michigan	Carbonate	Conventional Hydrocarbon
Michigan	Trenton	Paleozoic	Ordovician	mg/L	188300	860	19200	119000	138.372	3300	4400	41000	47.6744	67900	260	490	0.00204082	-27	-2.1	0.70991	-78.7	-11.51	Michigan	Carbonate	Conventional Hydrocarbon
Michigan	Trenton	Paleozoic	Ordovician	mg/L	184800	800	18300	118000	147.5	3100	3800	40000	50	65200	540	450	0.00222222	-27	-2	0.71	-71.8	-10.24	Michigan	Carbonate	Conventional Hydrocarbon
Michigan	Trenton	Paleozoic	Ordovician	mg/L	196000	920	21000	123000	133.696	3500	4600	43000	46.7391	72100	310	510	0.00196078	-26	-1.9	0.70977	-72.1	-10.57	Michigan	Carbonate	Conventional Hydrocarbon
Michigan	Trenton	Paleozoic	Ordovician	mg/L	209500	910	22000	133000	146.154	4000	4300	44000	48.3516	74300	470	550	0.00181818	-29	-1.8	0.71027	-62.6	-9.16	Michigan	Carbonate	Conventional Hydrocarbon
Michigan	Trenton	Paleozoic	Ordovician	mg/L	195300	930	22000	122000	131.183	3100	4300	42000	45.1613	71400	400	490	0.00204082	-27	-1.7	0.70958	-83.8	-11.86	Michigan	Carbonate	Conventional Hydrocarbon
Michigan	Trenton	Paleozoic	Ordovician	mg/L	190200	920	21000	118000	128.261	3500	4700	41000	44.5652	70200	420	510	0.00196078	-24	-1.6	0.70985	-67.6	-9.89	Michigan	Carbonate	Conventional Hydrocarbon
Michigan	Trenton	Paleozoic	Ordovician	mg/L	199400	880	21000	126000	143.182	3800	4100	43000	48.8636	71900	490	510	0.00196078	-33	-1.5	0.71003	-72.2	-10.19	Michigan	Carbonate	Conventional Hydrocarbon
Michigan	Trenton	Paleozoic	Ordovician	mg/L	249700	1160	31000	160000	137.931	3400	5500	48000	41.3793	87900	330	600	0.00166667	-45	-1.3	0.70887	-70.7	-10.53	Michigan	Carbonate	Conventional Hydrocarbon
Michigan	Trenton	Paleozoic	Ordovician	mg/L	346100	1780	55000	220000	123.596	5300	7800	53000	29.7753	121100	129	1060	0.000943396	-35	0.4	0.70827			Michigan	Carbonate	Conventional Hydrocarbon
Michigan	Trenton	Paleozoic	Ordovician	mg/L	242700	1190	33000	150000	126.05	2100	6000	50000	42.0168	91100	340	620	0.0016129	-32	-3.1	0.71045				Carbonate	Conventional Hydrocarbon
Michigan	Trenton	Paleozoic	Ordovician	mg/L	273600	1170	37000	176000	150.427	2300	7900	49000	41.8803	96200	260	630	0.0015873	-31	-2.3	0.71029				Carbonate	Conventional Hydrocarbon
Michigan	Trenton	Paleozoic	Ordovician	mg/L	165000	550	17400	103000	187.273	1690	4300	37000	67.2727	60390	410	570	0.00175439	-28	-2.2	0.70982				Carbonate	Conventional Hydrocarbon
Michigan	Trenton	Paleozoic	Ordovician	mg/L	237800	1120	31000	150000	133.929	2300	6500	46000	41.0714	85800	380	530	0.00188679	-27	-2.2	0.71023				Carbonate	Conventional Hydrocarbon
Michigan	Trenton	Paleozoic	Ordovician	mg/L	156900	580	15600	99000	170.69	1600	3700	36000	62.069	56900	450	530	0.00188679	-31	-2.1	0.70978				Carbonate	Conventional Hydrocarbon
Michigan	Trenton	Paleozoic	Ordovician	mg/L	238500	1190	33000	148000	124.37	2400	6500	47000	39.4958	88900	350	530	0.00188679	-30	-2.1	0.71041				Carbonate	Conventional Hydrocarbon
Michigan	Trenton	Paleozoic	Ordovician	mg/L	247300	950	37000	151000	158.947	2300	7400	49000	51.5789	95700	260	610	0.00163934	-27	-2.1	0.709				Carbonate	Conventional Hydrocarbon
Michigan	Trenton	Paleozoic	Ordovician	mg/L	260700	1150	33000	161000	140	2400	7300	55000	47.8261	97700	320	580	0.00172414	-27	-2.1	0.71007				Carbonate	Conventional Hydrocarbon
Michigan	Trenton	Paleozoic	Ordovician	mg/L	234300	1170	33000	141000	120.513	2400	6800	49000	41.8803	91200	360	550	0.00181818	-33	-2	0.71036				Carbonate	Conventional Hydrocarbon
Michigan	Trenton	Paleozoic	Ordovician	mg/L	262100	1370	39000	166000	121.168	2100	6900	45000	32.8467	93000	320	730	0.00136986	-29	-2	0.7103				Carbonate	Conventional Hydrocarbon
Michigan	Trenton	Paleozoic	Ordovician	mg/L	225000	770	27000	142000	184.416	2100	5200	47000	61.039	81300	490	470	0.00212766	-23	-2					Carbonate	Conventional Hydrocarbon
Michigan	Trenton	Paleozoic	Ordovician	mg/L	206700	860	24000	132000	153.488	2100	6100	41000	47.6744	73200	152	740	0.00135135	-29	-1.9	0.70973				Carbonate	Conventional Hydrocarbon
Michigan	Trenton	Paleozoic	Ordovician	mg/L	255500	1610	37000	161000	100	2300	7300	46000	28.5714	92600	270	730	0.00136986	-26	-1.9	0.7103				Carbonate	Conventional Hydrocarbon
Michigan	Trenton	Paleozoic	Ordovician	mg/L	229400	780	31000	147000	188.462	2200	5400	42000	53.8462	80600	390	520	0.00192308	-24	-1.8					Carbonate	Conventional Hydrocarbon
Michigan	Trenton	Paleozoic	Ordovician	mg/L	183700	830	23000	111000	133.735	1970	5500	40000	48.1928	70470	630	400	0.0025	-30	-1.7	0.70996				Carbonate	Conventional Hydrocarbon
Michigan	Trenton	Paleozoic	Ordovician	mg/L	158200	730	16000	100000	136.986	1600	3500	35000	47.9452	56100	740	540	0.00185185	-23	-1.7	0.7098				Carbonate	Conventional Hydrocarbon
Michigan	Trenton	Paleozoic	Ordovician	mg/L	242700	1190	33000	150000	126.05	2100	6000	50000	42.0168	91100	340	620	0.0016129	-32	-3.1	0.71045				Carbonate	Conventional Hydrocarbon
Michigan	Trenton	Paleozoic	Ordovician	mg/L	273600	1170	37000	176000	150.427	2300	7900	49000	41.8803	96200	260	630	0.0015873	-31	-2.3	0.71029				Carbonate	Conventional Hydrocarbon
Michigan	Trenton	Paleozoic	Ordovician	mg/L	165000	550	17400	103000	187.273	1690	4300	37000	67.2727	60390	410	570	0.00175439	-28	-2.2	0.70982				Carbonate	Conventional Hydrocarbon
Michigan	Trenton	Paleozoic	Ordovician	mg/L	237800	1120	31000	150000	133.929	2300	6500	46000	41.0714	85800	380	530	0.00188679	-27	-2.2	0.71023				Carbonate	Conventional Hydrocarbon
Michigan	Trenton	Paleozoic	Ordovician	mg/L	156900	580	15600	99000	170.69	1600	3700	36000	62.069	56900	450	530	0.00188679	-31	-2.1	0.70978				Carbonate	Conventional Hydrocarbon
Michigan	Trenton	Paleozoic	Ordovician	mg/L	238500	1190	33000	148000	124.37	2400	6500	47000	39.4958	88900	350	530	0.00188679	-30	-2.1	0.71041				Carbonate	Conventional Hydrocarbon
Michigan	Trenton	Paleozoic	Ordovician	mg/L	247300	950	37000	151000	158.947	2300	7400	49000	51.5789	95700	260	610	0.00163934	-27	-2.1	0.709				Carbonate	Conventional Hydrocarbon
Michigan	Trenton	Paleozoic	Ordovician	mg/L	260700	1150	33000	161000	140	2400	7300	55000	47.8261	97700	320	580	0.00172414	-27	-2.1	0.71007				Carbonate	Conventional Hydrocarbon
Michigan	Trenton	Paleozoic	Ordovician	mg/L	234300	1170	33000	141000	120.513	2400	6800	49000	41.8803	91200	360	550	0.00181818	-33	-2	0.71036				Carbonate	Conventional Hydrocarbon
Michigan	Trenton	Paleozoic	Ordovician	mg/L	262100	1370	39000	166000	121.168	2100	6900	45000	32.8467	93000	320	730	0.00136986	-29	-2	0.7103				Carbonate	Conventional Hydrocarbon
Michigan	Trenton	Paleozoic	Ordovician	mg/L	225000	770	27000	142000	184.416	2100	5200	47000	61.039	81300	490	470	0.00212766	-23	-2					Carbonate	Conventional Hydrocarbon
Michigan	Trenton	Paleozoic	Ordovician	mg/L	206700	860	24000	132000	153.488	2100	6100	41000	47.6744	73200	152	740	0.00135135	-29	-1.9	0.70973				Carbonate	Conventional Hydrocarbon
Michigan	Trenton	Paleozoic	Ordovician	mg/L	255500	1610	37000	161000	100	2300	7300	46000	28.5714	92600	270	730	0.00136986	-26	-1.9	0.7103				Carbonate	Conventional Hydrocarbon
Michigan	Trenton	Paleozoic	Ordovician	mg/L	229400	780	31000	147000	188.462	2200	5400	42000	53.8462	80600	390	520	0.00192308	-24	-1.8					Carbonate	Conventional Hydrocarbon
Michigan	Trenton	Paleozoic	Ordovician	mg/L	183700	830	23000	111000	133.735	1970	5500	40000	48.1928	70470	630	400	0.0025	-30	-1.7	0.70996				Carbonate	Conventional Hydrocarbon
Michigan	Trenton	Paleozoic	Ordovician	mg/L	158200	730	16000	100000	136.986	1600	3500	35000	47.9452	56100	740	540	0.00185185	-23	-1.7	0.7098				Carbonate	Conventional Hydrocarbon
Michigan	Trenton	Paleozoic	Ordovician	mg/L	238900	1220	33000	149000	122.131	2700	6600	46000	37.7049	88300	350	530	0.00188679	-36	-2.1	0.71034				Carbonate	Conventional Hydrocarbon
Michigan	Trenton	Paleozoic	Ordovician	mg/L	159400	560	15800	101000	180.357	1630	3500	36000	64.2857	56930	580	470	0.00212766	-31	-1.9	0.70976				Carbonate	Conventional Hydrocarbon
Michigan	Trenton	Paleozoic	Ordovician	mg/L	218200	910	24000	137000	150.549	4000	5100	46000	50.5495	79100	410	560	0.00178571	-20	-1.7	0.70992				Carbonate	Conventional Hydrocarbon
Michigan	Trenton	Paleozoic	Ordovician	mg/L	214600	890	24000	134000	150.562	3800	5200	46000	51.6854	79000	400	550	0.00181818	-25	-1.5					Carbonate	Conventional Hydrocarbon
Gulf Coast	Edwards	Mesozoic	Cretaceous	mg/L	24600	80	16000	14000	175	270	540	6700	83.75	23510	770	42	0.0238095	-24.5	-3.6	0.70882	-31.6	-4.49	Texas		Conventional Hydrocarbon
Gulf Coast	Edwards	Mesozoic	Cretaceous	mg/L			7073		#DIV/0!	1281	361	33600	#DIV/0!	42315		1668	0.00059952	-20	9.5	0.7088			Texas		Conventional Hydrocarbon
Gulf Coast	Edwards	Mesozoic	Cretaceous	mg/L	98211	241	9080	59100	245.228	2220	330	26000	107.884	37630		1240	0.000806452	-20	9.5	0.70869			Texas		Conventional Hydrocarbon
Gulf Coast	Edwards	Mesozoic	Cretaceous	mg/L	182570		13900	110600	#DIV/0!	2900	1220	51000	#DIV/0!	69020		2950	0.000338983	-15.3	12.3				Texas		Conventional Hydrocarbon
Gulf Coast	Edwards	Mesozoic	Cretaceous	mg/L	207725		17500	128000	#DIV/0!	2950	2350	56000	#DIV/0!	78800		925	0.00108108	-18.3	12.5				Texas		Conventional Hydrocarbon
Gulf Coast	Edwards	Mesozoic	Cretaceous	mg/L	282221	701	24500	173000	246.79	4800	830	74000	105.563	104130		4390	0.00022779	-17	12.8	0.7097			Texas		Conventional Hydrocarbon
Gulf Coast	Edwards	Mesozoic	Cretaceous	mg/L	231380		18900	140000	#DIV/0!	4400	1330	63500	#DIV/0!	88130		3250	0.000307692	-15.1	12.9				Texas		Conventional Hydrocarbon
Gulf Coast	Edwards	Mesozoic	Cretaceous	mg/L	110300	245	8320	64700	264.082	1380	395	33270	135.796	43365		1760	0.000568182		13	0.7087			Texas		Conventional Hydrocarbon
Gulf Coast	Edwards	Mesozoic	Cretaceous	mg/L	136200		10300	83200	#DIV/0!	1400	900	38000	#DIV/0!	50600		2400	0.000416667	-13.5	13				Texas		Conventional Hydrocarbon
Gulf Coast	Edwards	Mesozoic	Cretaceous	mg/L	132350		14100	81200	#DIV/0!	850	800	31400	#DIV/0!	47150		4000	0.00025	-26	13.1				Texas		Conventional Hydrocarbon
Gulf Coast	Edwards	Mesozoic	Cretaceous	mg/L	76456		5630	47000	#DIV/0!	2050	556	20100	#DIV/0!	28336		1120	0.000892857		13.1				Texas		Conventional Hydrocarbon
Gulf Coast	Edwards	Mesozoic	Cretaceous	mg/L	66956		6930	41000	#DIV/0!	610	201	17600	#DIV/0!	25341		615	0.00162602	-21.1	13.6				Texas		Conventional Hydrocarbon
Gulf Coast	Edwards	Mesozoic	Cretaceous	mg/L	127000	420	13000	76000	180.952	1100	1100	32000	76.1905	47200	1	1700	0.000588235	-10	13.9	0.70842			Texas		Conventional Hydrocarbon
Gulf Coast	Edwards	Mesozoic	Cretaceous	mg/L	108332	274	6510	64400	235.036	1271	325	34000	124.088	42106		1552	0.00064433	-22	13.9	0.7086			Texas		Conventional Hydrocarbon
Gulf Coast	Edwards	Mesozoic	Cretaceous	mg/L	105640		7390	64400	#DIV/0!	1400	340	30500	#DIV/0!	39630		1610	0.000621118	-22	13.9				Texas		Conventional Hydrocarbon
Gulf Coast	Edwards	Mesozoic	Cretaceous	mg/L	70977	181	3479	42800	236.464	494	202	22900	126.519	27075		854	0.00117096	-21	14.2				Texas		Conventional Hydrocarbon
Gulf Coast	Edwards	Mesozoic	Cretaceous	mg/L	56394	123	2720	34150	277.642	495	151	18100	147.154	21466	10	589	0.00169779	-2	14.4	0.70794			Texas		Conventional Hydrocarbon
Gulf Coast	Edwards	Mesozoic	Cretaceous	mg/L	205130		15500	123600	#DIV/0!	4700	630	58000	#DIV/0!	78830		2700	0.00037037	-26	14.4				Texas		Conventional Hydrocarbon
Gulf Coast	Edwards	Mesozoic	Cretaceous	mg/L	72897	177	3980	44700	252.542	510	220	22200	125.424	26910		1110	0.000900901	-14.7	14.7				Texas		Conventional Hydrocarbon
Gulf Coast	Edwards	Mesozoic	Cretaceous	mg/L	218770		16900	132900	#DIV/0!	4600	630	60600	#DIV/0!	82730		3140	0.000318471	-6	18				Texas		Conventional Hydrocarbon
Gulf Coast	Edwards	Mesozoic	Cretaceous	mg/L	193750	732	15800	119000	162.568	2300	2150	53000	72.4044	73250		768	0.00130208	-18.2	9.5				Texas		Conventional Hydrocarbon
Gulf Coast	Edwards	Mesozoic	Cretaceous	mg/L	308458	858	28600	189000	220.28	5600	800	77500	90.3263	112500		4980	0.000200803	-17.1	9.7	0.709			Texas		Conventional Hydrocarbon
Gulf Coast	Edwards	Mesozoic	Cretaceous	mg/L	218390		21800	133000	#DIV/0!	3400	1460	56500	#DIV/0!	83160		2230	0.00044843	-7.7	10				Texas		Conventional Hydrocarbon
Gulf Coast	Edwards	Mesozoic	Cretaceous	mg/L	187185		15700	114000	#DIV/0!	1885	2350	51500	#DIV/0!	71435		1750	0.000571429	-15.2	10.1				Texas		Conventional Hydrocarbon
Gulf Coast	Edwards	Mesozoic	Cretaceous	mg/L	253577	910	21000	153300	168.462	4640	1810	69670	76.5604	97120	191	2030	0.000492611		10.2	0.7092			Texas		Conventional Hydrocarbon
Gulf Coast	Edwards	Mesozoic	Cretaceous	mg/L	237920		20500	146000	#DIV/0!	4400	1710	64000	#DIV/0!	90610		1310	0.000763359	-21	10.3				Texas		Conventional Hydrocarbon
Gulf Coast	Edwards	Mesozoic	Cretaceous	mg/L	125702	273	9921	75960	278.242	991	995	35538	130.176	47445	6	1890	0.000529101		10.3	0.7083			Texas		Conventional Hydrocarbon
Gulf Coast	Edwards	Mesozoic	Cretaceous	mg/L	231000	830	20000	140000	168.675	4500	1600	61000	73.494	87100	4	2200	0.000454545	-1.5	10.4	0.70928			Texas		Conventional Hydrocarbon
Gulf Coast	Edwards	Mesozoic	Cretaceous	mg/L	153385		15000	83800	#DIV/0!	1175	2060	49000	#DIV/0!	67235		2350	0.000425532	-20.1	10.4				Texas		Conventional Hydrocarbon
Gulf Coast	Edwards	Mesozoic	Cretaceous	mg/L	237231	881	20100	145000	164.586	4200	1670	63000	71.5096	88970		2380	0.000420168	-9.4	10.4				Texas		Conventional Hydrocarbon
Gulf Coast	Edwards	Mesozoic	Cretaceous	mg/L	102576	246	5893	61470	249.878	428	616	32472	132	39409	84	1347	0.00074239		10.4	0.70781			Texas		Conventional Hydrocarbon
Gulf Coast	Edwards	Mesozoic	Cretaceous	mg/L	204950		16600	125000	#DIV/0!	2340	2210	56500	#DIV/0!	77650		2300	0.000434783	-17.9	10.6				Texas		Conventional Hydrocarbon
Gulf Coast	Edwards	Mesozoic	Cretaceous	mg/L	165093	407	13425	99460	244.373	2480	1193	45564	111.951	62662	52	2462	0.000406174		10.6	0.7089			Texas		Conventional Hydrocarbon
Gulf Coast	Edwards	Mesozoic	Cretaceous	mg/L	171148	585	11156	107200	183.248	2410	1170	46800	80	61536		1802	0.000554939	-14	10.7	0.709			Texas		Conventional Hydrocarbon
Gulf Coast	Edwards	Mesozoic	Cretaceous	mg/L	187360		14900	114300	#DIV/0!	2900	1380	52000	#DIV/0!	71180		1880	0.000531915	-13.5	10.7				Texas		Conventional Hydrocarbon
Gulf Coast	Edwards	Mesozoic	Cretaceous	mg/L	222410		17500	134000	#DIV/0!	3190	2270	63300	#DIV/0!	86260		2150	0.000465116	-14.4	10.8				Texas		Conventional Hydrocarbon
Gulf Coast	Edwards	Mesozoic	Cretaceous	mg/L	169489	396	13947	102700	259.343	2065	1171	46670	117.854	63853	74	2429	0.000411692		10.8	0.70879			Texas		Conventional Hydrocarbon
Gulf Coast	Edwards	Mesozoic	Cretaceous	mg/L	116730		8900	71500	#DIV/0!	1400	760	32000	#DIV/0!	43060		2170	0.000460829	-9.5	8.5				Texas		Conventional Hydrocarbon
Gulf Coast	Edwards	Mesozoic	Cretaceous	mg/L	206320		17600	125000	#DIV/0!	3400	1580	56500	#DIV/0!	79080		2240	0.000446429	-6.5	8.5				Texas		Conventional Hydrocarbon
Gulf Coast	Edwards	Mesozoic	Cretaceous	mg/L	230748	700	18500	140000	200	3570	1840	63970	91.3857	87880	79	2030	0.000492611		8.6				Texas		Conventional Hydrocarbon
Gulf Coast	Edwards	Mesozoic	Cretaceous	mg/L	83880		8530	51500	#DIV/0!	890	370	21500	#DIV/0!	31290		1090	0.000917431	-21.2	11.4				Texas		Conventional Hydrocarbon
Gulf Coast	Edwards	Mesozoic	Cretaceous	mg/L	216622	516	19068	131100	254.07	2930	1727	58253	112.893	81978	74	2911	0.000343525		11.5	0.70901			Texas		Conventional Hydrocarbon
Gulf Coast	Edwards	Mesozoic	Cretaceous	mg/L	85234	344	7230	52700	153.198	1050	1030	22400	65.1163	31710		480	0.00208333		3.2		-77.4	-9.55	Texas		Conventional Hydrocarbon
Gulf Coast	Edwards	Mesozoic	Cretaceous	mg/L	24138	85	1770	14400	169.412	260	580	6990	82.2353	9600		53	0.0188679	-26.6	-2.5		-20.3	-3.57	Texas		Conventional Hydrocarbon
Gulf Coast	Edwards	Mesozoic	Cretaceous	mg/L	23471		1710	14200	#DIV/0!	250	550	6710	#DIV/0!	9220		51	0.0196078	-22.1	-2.3		-16.5	-3.05	Texas		Conventional Hydrocarbon
Gulf Coast	Edwards	Mesozoic	Cretaceous	mg/L	22492	73.3	1580	13500	184.175	250	540	6500	88.6767	8870		49	0.0204082	-16.9	-1.7		-15.5	-2.85	Texas		Conventional Hydrocarbon
Gulf Coast	Edwards	Mesozoic	Cretaceous	mg/L	155000	560	14000	95000	169.643	1300	1300	40000	71.4286	56600	2	2100	0.00047619	-9.5	11.8	0.70958			Texas		Conventional Hydrocarbon
Gulf Coast	Edwards	Mesozoic	Cretaceous	mg/L	71138		6770	43500	#DIV/0!	340	360	19300	#DIV/0!	26770		868	0.00115207	-26.6	3.4		-28.3	-3.93	Texas		Conventional Hydrocarbon
Gulf Coast	Edwards	Mesozoic	Cretaceous	mg/L	203000	820	18000	125000	152.439	3200	2900	51000	62.1951	75100	120	910	0.0010989	0.5	6.7	0.70939			Texas		Conventional Hydrocarbon
Gulf Coast	Edwards	Mesozoic	Cretaceous	mg/L	138580		10800	86600	#DIV/0!	2800	830	35900	#DIV/0!	50330		1650	0.000606061	10.1	6.7				Texas		Conventional Hydrocarbon
Gulf Coast	Edwards	Mesozoic	Cretaceous	mg/L	23063		1670	13900	#DIV/0!	260	550	6630	#DIV/0!	9110		53	0.0188679	-26	-3		-33.3	-4.48	Texas		Conventional Hydrocarbon
Gulf Coast	Edwards	Mesozoic	Cretaceous	mg/L	180830		26000	111300	#DIV/0!	2000	520	39200	#DIV/0!	67720		1810	0.000552486	-18					Texas		Conventional Hydrocarbon
Gulf Coast	Edwards	Mesozoic	Cretaceous	mg/L	232000	810	17000	140000	172.84	5800	1600	63000	77.7778	87400	2	2600	0.000384615	1	9	0.70939			Texas		Conventional Hydrocarbon
Gulf Coast	Edwards	Mesozoic	Cretaceous	mg/L	214000	820	18000	130000	158.537	3400	1500	57000	69.5122	79900	6	1800	0.000555556	-2.5	9.2	0.70953			Texas		Conventional Hydrocarbon
Gulf Coast	Edwards	Mesozoic	Cretaceous	mg/L	55793	139	6410	31950	229.856	1480	803	14300	102.878	22993	48	647	0.0015456		5.9	0.70899			Texas		Conventional Hydrocarbon
Gulf Coast	Edwards	Mesozoic	Cretaceous	mg/L	66893	170	5444	40340	237.294	590	539	18240	107.294	24813	32	1524	0.000656168		3.8	0.70801	-15.1	-1.98	Texas		Conventional Hydrocarbon
Gulf Coast	Edwards	Mesozoic	Cretaceous	mg/L	192715		16300	117000	#DIV/0!	2475	2250	53800	#DIV/0!	74825		890	0.0011236	-12.9	9.2				Texas		Conventional Hydrocarbon
Gulf Coast	Edwards	Mesozoic	Cretaceous	mg/L	107745	265	17200	66500	250.943	250	520	22200	83.7736	40170		810	0.00123457	-4	7.8				Texas		Conventional Hydrocarbon
Gulf Coast	Edwards	Mesozoic	Cretaceous	mg/L	38647	99	3132	23360	235.96	287	333	10976	110.869	14728	6	410	0.00243902		6.1	0.70831			Texas		Conventional Hydrocarbon
Gulf Coast	Edwards	Mesozoic	Cretaceous	mg/L	60794		3320	37200	#DIV/0!	540	174	18700	#DIV/0!	22734		860	0.00116279	-15.3	11.8				Texas		Conventional Hydrocarbon
Gulf Coast	Edwards	Mesozoic	Cretaceous	mg/L	77891		3530	47600	#DIV/0!	281	890	25100	#DIV/0!	29801		490	0.00204082	-24	5.2				Texas		Conventional Hydrocarbon
Gulf Coast	Edwards	Mesozoic	Cretaceous	mg/L	69180		2260	42600	#DIV/0!	253	647	23100	#DIV/0!	26260		320	0.003125	-20	5.2				Texas		Conventional Hydrocarbon
Gulf Coast	Edwards	Mesozoic	Cretaceous	mg/L	104985		6330	63800	#DIV/0!	605	1360	32500	#DIV/0!	40795		390	0.0025641	-16.2	6.4				Texas		Conventional Hydrocarbon
Gulf Coast	Edwards	Mesozoic	Cretaceous	mg/L	173530		13900	106000	#DIV/0!	3700	960	47000	#DIV/0!	65560		1970	0.000507614	12.1	6.4				Texas		Conventional Hydrocarbon
Gulf Coast	Edwards	Mesozoic	Cretaceous	mg/L	112397	441	7500	68700	155.782	875	1526	33000	74.8299	42901		355	0.0028169	-21.7	6.5				Texas		Conventional Hydrocarbon
Gulf Coast	Edwards	Mesozoic	Cretaceous	mg/L	109692	367	8080	68100	185.559	1510	805	29700	80.9264	40095		1105	0.000904977		5.5	0.7088			Texas		Conventional Hydrocarbon
Gulf Coast	Edwards	Mesozoic	Cretaceous	mg/L	25200	82	1900	14000	170.732	130	580	6500	79.2683	9110	1700	45	0.0222222	-24.5	-3.6	0.70879	-41	-5.92	Texas		Conventional Hydrocarbon
Gulf Coast	Edwards	Mesozoic	Cretaceous	mg/L	24622		1630	14800	#DIV/0!	260	540	7170	#DIV/0!	9600		69	0.0144928	-22.9	-3.6		-33.8	-4.5	Texas		Conventional Hydrocarbon
Gulf Coast	Wilcox	Cenozoic	Paleogene	mg/L	21752	12.3		12890	1047.97			8850	719.512	8850			#DIV/0!		9.7	0.7109			Texas		Conventional Hydrocarbon
Gulf Coast	Wilcox	Cenozoic	Paleogene	mg/L	10939		74	5850	#DIV/0!	239	12	4750	#DIV/0!	5075		14	0.0714286	-20	-5.4		-41.3	-6.01	Texas		Conventional Hydrocarbon
Gulf Coast	Wilcox	Cenozoic	Paleogene	mg/L	135268		5810	82800	#DIV/0!	900	570	44000	#DIV/0!	51280		1188	0.000841751	-22	-5.4		-40.4	-5.78	Texas		Conventional Hydrocarbon
Gulf Coast	Wilcox	Cenozoic	Paleogene	mg/L	28500	90	270	18000	200	68	34	11000	122.222	11372	47	47	0.0212766	-20	4.1				Texas		Conventional Hydrocarbon
Gulf Coast	Wilcox	Cenozoic	Paleogene	mg/L	8701	1		5400	5400			3300	3300	3300			#DIV/0!		4.1				Texas		Conventional Hydrocarbon
Gulf Coast	Wilcox	Cenozoic	Paleogene	mg/L	5573		26	3300	#DIV/0!	38	4.8	2200	#DIV/0!	2268.8		4	0.25	-42	-4.7		-43.8	-5.94	Texas		Conventional Hydrocarbon
Gulf Coast	Wilcox	Cenozoic	Paleogene	mg/L	20000	75	180	12000	160	58	22	7900	105.333	8160	26	20	0.05	-23	4				Texas		Conventional Hydrocarbon
Gulf Coast	Wilcox	Cenozoic	Paleogene	mg/L	7084	12.6	15	3900	309.524	40	5.4	3100	246.032	3160.4		10.8	0.0925926	-17	-4.4		-35.6	-4.69	Texas		Conventional Hydrocarbon
Gulf Coast	Wilcox	Cenozoic	Paleogene	mg/L	18569	9.19		11400	1240.48			7160	779.108	7160			#DIV/0!		7	0.71097			Texas		Conventional Hydrocarbon
Gulf Coast	Wilcox	Cenozoic	Paleogene	mg/L	26876	95.3	252	15860	166.422	97	28	10460	109.759	10837	18	44	0.0227273		5.1	0.7125			Texas		Conventional Hydrocarbon
Gulf Coast	Wilcox	Cenozoic	Paleogene	mg/L	82226	190	3640	50700	266.842	244	291	26600	140	30775		561	0.00178253	-11.9	4.6	0.7104			Texas		Conventional Hydrocarbon
Gulf Coast	Wilcox	Cenozoic	Paleogene	mg/L	33591	97.6	530	20240	207.377	245	24	12290	125.922	13089	9	95.7	0.0104493		5.3	0.7115			Texas		Conventional Hydrocarbon
Gulf Coast	Wilcox	Cenozoic	Paleogene	mg/L	65737		1920	40700	#DIV/0!	182	185	22500	#DIV/0!	24787		250	0.004	-4	5.4				Texas		Conventional Hydrocarbon
Gulf Coast	Wilcox	Cenozoic	Paleogene	mg/L	78710	145	2720	47700	328.966	226	255	27300	188.276	30501		364	0.00274725	-2.4	5.4				Texas		Conventional Hydrocarbon
Gulf Coast	Wilcox	Cenozoic	Paleogene	mg/L	22692	18	502	14000	777.778	190	40	7800	433.333	8532		142	0.00704225	-25	-0.6	0.7121	-14.6	-1.95	Texas		Conventional Hydrocarbon
Gulf Coast	Wilcox	Cenozoic	Paleogene	mg/L	25599	70	180	14000	200	80	23	10000	142.857	10283	48	28	0.0357143	-20	3.5	0.7101	-21.1	-2.8	Texas		Conventional Hydrocarbon
Gulf Coast	Wilcox	Cenozoic	Paleogene	mg/L	81735		4710	51500	#DIV/0!	637	592	23600	#DIV/0!	29539		696	0.00143678	-12	2.8		-0.8	-0.25	Texas		Conventional Hydrocarbon
Gulf Coast	Wilcox	Cenozoic	Paleogene	mg/L	28871	55	430	17700	321.818	403	18	10100	183.636	10951		165	0.00606061		3.1	0.7114	-69.5	-8.92	Texas		Conventional Hydrocarbon
Gulf Coast	Wilcox	Cenozoic	Paleogene	mg/L	6930	13	14	4020	309.231	42.7	4.3	2830	217.692	2891		3	0.333333		3.2	0.7069	-70.5	-8.07	Texas		Conventional Hydrocarbon
Gulf Coast	Wilcox	Cenozoic	Paleogene	mg/L	52106	94		32000	340.426			20000	212.766	20000	12		#DIV/0!	-15	3.5	0.7081	-33.4	-5.05	Texas		Conventional Hydrocarbon
Gulf Coast	Wilcox	Cenozoic	Paleogene	mg/L	79377		2690	49500	#DIV/0!	471	426	25700	#DIV/0!	29287		590	0.00169492		2.9	0.7115	-17.1	-3.1	Texas		Conventional Hydrocarbon
Gulf Coast	Wilcox	Cenozoic	Paleogene	mg/L	22300	78	130	13000	166.667	63	18	8900	114.103	9111	57	26	0.0384615	-20	3	0.7094	-70.9	-8.49	Texas		Conventional Hydrocarbon
Gulf Coast	Wilcox	Cenozoic	Paleogene	mg/L	22493	84.9	255	13600	160.188	68	19	8388	98.7986	8730	22	37.1	0.0269542		3.8	0.7127	-13.4	-1.64	Texas		Conventional Hydrocarbon
Gulf Coast	Wilcox	Cenozoic	Paleogene	mg/L	90199	299		56640	189.431			33260	111.237	33260			#DIV/0!		3.7	0.70932	-29.7	-4.97	Texas		Conventional Hydrocarbon
Gulf Coast	Wilcox	Cenozoic	Paleogene	mg/L	6475	13	16.5	3710	285.385	28.6	4.5	2680	206.154	2729.6	16	4.6	0.217391		3.5	0.7066	-26.9	-3.24	Texas		Conventional Hydrocarbon
Gulf Coast	Wilcox	Cenozoic	Paleogene	mg/L	24500	86	160	14000	162.791	81	23	9700	112.791	9964	60	31	0.0322581	-19	3.6	0.7092	-28.7	-4.43	Texas		Conventional Hydrocarbon
Gulf Coast	Wilcox	Cenozoic	Paleogene	mg/L	21986		121	11000	#DIV/0!	117	12	10700	#DIV/0!	10950		36	0.0277778	-10	3.6		-27.6	-4.36	Texas		Conventional Hydrocarbon
Gulf Coast	Wilcox	Cenozoic	Paleogene	mg/L	5516	13		3480	267.692			2023	155.615	2023			#DIV/0!	-25	-0.6		-19.4	-3.12	Texas		Conventional Hydrocarbon
Gulf Coast	Wilcox	Cenozoic	Paleogene	mg/L	61143		1820	37500	#DIV/0!	592	258	20600	#DIV/0!	23270		373	0.00268097	2.5	1.7		-8.1	-0.65	Texas		Conventional Hydrocarbon
Gulf Coast	Wilcox	Cenozoic	Paleogene	mg/L	16000	62	80	9300	150	140	9.5	6500	104.839	6729.5	51	15	0.0666667	-23	1.8		-29.4	-4.73	Texas		Conventional Hydrocarbon
Gulf Coast	Wilcox	Cenozoic	Paleogene	mg/L	55665	98	1750	33500	341.837	446	272	18800	191.837	21268		398	0.00251256	3.3	1.9	0.7109	-17.9	-2.37	Texas		Conventional Hydrocarbon
Gulf Coast	Wilcox	Cenozoic	Paleogene	mg/L	86762		857	53000	#DIV/0!	230	140	32400	#DIV/0!	33627		135	0.00740741	-10	2.2		-2.5	-0.43	Texas		Conventional Hydrocarbon
Gulf Coast	Wilcox	Cenozoic	Paleogene	mg/L	76837	105	3760	48500	461.905	571	505	22800	217.143	27636		596	0.00167785	-6	2.7	0.7117	-12.8	-1.6	Texas		Conventional Hydrocarbon
Gulf Coast	Wilcox	Cenozoic	Paleogene	mg/L	49948	120	937	30000	250	251	153	18300	152.5	19641		187	0.00534759	3	2.7	0.7105	-17.1	-2.73	Texas		Conventional Hydrocarbon
Gulf Coast	Wilcox	Cenozoic	Paleogene	mg/L	50210	110	912	30000	272.727	250	145	18600	169.091	19907		193	0.00518135	-4.3	2	0.7106	-17.1	-3.08	Texas		Conventional Hydrocarbon
Gulf Coast	Wilcox	Cenozoic	Paleogene	mg/L	68370	62.5	690	43500	696	169	135	23700	379.2	24694		113	0.00884956	-15	2.1		-18	-3.58	Texas		Conventional Hydrocarbon
Gulf Coast	Wilcox	Cenozoic	Paleogene	mg/L	86092	52	858	51500	990.385	235	140	33100	636.538	34333	72	135	0.00740741	-13	2.1	0.7081	-20.7	-3.15	Texas		Conventional Hydrocarbon
Gulf Coast	Wilcox	Cenozoic	Paleogene	mg/L	74104	52	770	45500	875	190	167	27300	525	28427		125	0.008	-11	2.1	0.7082	-27	-5	Texas		Conventional Hydrocarbon
Gulf Coast	Wilcox	Cenozoic	Paleogene	mg/L	70908		2150	44500	#DIV/0!	422	265	23300	#DIV/0!	26137		271	0.00369004	-7	2.3		-8.5	-1.69	Texas		Conventional Hydrocarbon
Gulf Coast	Wilcox	Cenozoic	Paleogene	mg/L	117170		8420	74500	#DIV/0!	784	871	31700	#DIV/0!	41775		895	0.00111732	-5.7	2.5		-23.8	-4.78	Texas		Conventional Hydrocarbon
Gulf Coast	Wilcox	Cenozoic	Paleogene	mg/L	1658	18.2		590	32.4176			1050	57.6923	1050			#DIV/0!	-5.7	2.6	0.71186	-13.8	-1.96	Texas		Conventional Hydrocarbon
Gulf Coast	Wilcox	Cenozoic	Paleogene	mg/L	56870		912	34000	#DIV/0!	236	148	21400	#DIV/0!	22696		174	0.00574713	2.6	2.6		-28.3	-4.75	Texas		Conventional Hydrocarbon
Gulf Coast	Wilcox	Cenozoic	Paleogene	mg/L			328		#DIV/0!	108	57	12000	#DIV/0!	12493		74	0.0135135	-15	-0.3		-23.2	-3.65	Texas		Conventional Hydrocarbon
Gulf Coast	Wilcox	Cenozoic	Paleogene	mg/L	98976	55	3360	60600	1101.82	805	407	33000	600	37572		749	0.00133511	-6	0.2	0.7119	-10.6	-2.16	Texas		Conventional Hydrocarbon
Gulf Coast	Wilcox	Cenozoic	Paleogene	mg/L	38645	49.4	672	23600	477.733	192	92	13900	281.377	14856		140	0.00714286	-4.1	0.2	0.7092	-10.5	-1.94	Texas		Conventional Hydrocarbon
Gulf Coast	Wilcox	Cenozoic	Paleogene	mg/L			4380		#DIV/0!	928	520	36300	#DIV/0!	42128		763	0.00131062	-16	0.4		-20.8	-3.57	Texas		Conventional Hydrocarbon
Gulf Coast	Wilcox	Cenozoic	Paleogene	mg/L	19000	69	110	11000	159.42	130	14	7200	104.348	7454	61	23	0.0434783	-26	0.5	0.709	-14.1	-3.18	Texas		Conventional Hydrocarbon
Gulf Coast	Wilcox	Cenozoic	Paleogene	mg/L	70837	1090	1990	41200	37.7982	393	307	25400	23.3028	28090		457	0.00218818	6.6	0.8	0.7105	-8.5	-2.55	Texas		Conventional Hydrocarbon
Gulf Coast	Wilcox	Cenozoic	Paleogene	mg/L	38900			24100	#DIV/0!			14800	#DIV/0!	14800			#DIV/0!	-2	1.3		-34.7	-4.99	Texas		Conventional Hydrocarbon
Gulf Coast	Wilcox	Cenozoic	Paleogene	mg/L	6882	78	69.1	4060	52.0513	33	8.4	2610	33.4615	2720.5	9	10	0.1	-6	-0.1	0.7122	-9.9	-1.84	Texas		Conventional Hydrocarbon
Gulf Coast	Wilcox	Cenozoic	Paleogene	mg/L	16000	56	85	9300	166.071	160	11	6300	112.5	6556	8	18	0.0555556	-23	0.1		-9.9	-2.22	Texas		Conventional Hydrocarbon
Gulf Coast	Wilcox	Cenozoic	Paleogene	mg/L	6981	13.5	15.2	3800	281.481	41	5.7	3100	229.63	3161.9		5.4	0.185185	-7	-4.4		-32.6	-4.21	Texas		Conventional Hydrocarbon
Gulf Coast	Wilcox	Cenozoic	Paleogene	mg/L	6706	85	54.4	3890	45.7647	24	3.6	2595	30.5294	2677	12	29.8	0.033557	-26	0.6	0.7125	-17.1	-3.54	Texas		Conventional Hydrocarbon
Gulf Coast	Wilcox	Cenozoic	Paleogene	mg/L	19500	64	100	12000	187.5	200	13	7300	114.062	7613	68	23	0.0434783	-23	0.6		-17	-3.42	Texas		Conventional Hydrocarbon
Gulf Coast	Wilcox	Cenozoic	Paleogene	mg/L	49174		1170	29500	#DIV/0!	221	206	17900	#DIV/0!	19497		177	0.00564972	1.1	0.6		-21	-4.1	Texas		Conventional Hydrocarbon
Gulf Coast	Wilcox	Cenozoic	Paleogene	mg/L	19477	59.3	187	11650	196.459	67	15.2	7434	125.363	7703.2	17	33.3	0.03003		3.4	0.7121	-32.1	-4.62	Texas		Conventional Hydrocarbon
Gulf Coast	Wilcox	Cenozoic	Paleogene	mg/L	24100	70	85	11000	157.143	110	13	6900	98.5714	7108	12	17	0.0588235	-22	3.4		-22.7	-2.91	Texas		Conventional Hydrocarbon
Gulf Coast	Wilcox	Cenozoic	Paleogene	mg/L	17165	86	70	9000	104.651	58	11	6500	75.5814	6639	72	14	0.0714286	-21	3.4	0.7108	-22.1	-3.03	Texas		Conventional Hydrocarbon
Gulf Coast	Wilcox	Cenozoic	Paleogene	mg/L	20868	86.9	209	13060	150.288	51	14.5	7386	84.9942	7660.5	15	33.2	0.0301205		3.7	0.7126	-29.2	-4.58	Texas		Conventional Hydrocarbon
Gulf Coast	Wilcox	Cenozoic	Paleogene	mg/L	27500	79	240	17000	215.19	54	32	11000	139.241	11326	52	36	0.0277778	-18	3.7	0.7105	-31	-4.93	Texas		Conventional Hydrocarbon
Gulf Coast	Wilcox	Cenozoic	Paleogene	mg/L	27372		229	16200	#DIV/0!	122	55.9	10371	#DIV/0!	10777.9		394	0.00253807	-16	-2.7	0.7134	-27.8	-3.53	Texas		Conventional Hydrocarbon
Gulf Coast	Wilcox	Cenozoic	Paleogene	mg/L	55940	32	1000	34010	1062.81	357	141	20200	631.25	21698		200	0.005	-21	1.2	0.7092	-22.4	-3.39	Texas		Conventional Hydrocarbon
Gulf Coast	Wilcox	Cenozoic	Paleogene	mg/L	16000	54	71	7800	144.444	110	9.3	5900	109.259	6090.3	42	14	0.0714286	-24	1.2		-10.2	-0.56	Texas		Conventional Hydrocarbon
Gulf Coast	Wilcox	Cenozoic	Paleogene	mg/L	108368		5300	64500	#DIV/0!	911	586	36290	#DIV/0!	43087		781	0.00128041	-11	1.2		-18.8	-1.66	Texas		Conventional Hydrocarbon
Gulf Coast	Wilcox	Cenozoic	Paleogene	mg/L			1610		#DIV/0!	418	297	22400	#DIV/0!	24725		238	0.00420168	-11	1.2		-23.2	-2.98	Texas		Conventional Hydrocarbon
Gulf Coast	Wilcox	Cenozoic	Paleogene	mg/L	19073	13.3		11990	901.504			7070	531.579	7070			#DIV/0!	-11	1.3	0.71189	-32.3	-4.67	Texas		Conventional Hydrocarbon
Gulf Coast	Wilcox	Cenozoic	Paleogene	mg/L					#DIV/0!			8590	#DIV/0!	8590			#DIV/0!	-16	-2.6		-33	-4.59	Texas		Conventional Hydrocarbon
Gulf Coast	Wilcox	Cenozoic	Paleogene	mg/L	8832		178	5300	#DIV/0!	63	17	3240	#DIV/0!	3498		34	0.0294118	1.4	-2.5		-16.9	-2.78	Texas		Conventional Hydrocarbon
Gulf Coast	Wilcox	Cenozoic	Paleogene	mg/L	34357		791	21400	#DIV/0!	152	136	11700	#DIV/0!	12779		178	0.00561798	3	-1.2		-9.2	-1.77	Texas		Conventional Hydrocarbon
Gulf Coast	Wilcox	Cenozoic	Paleogene	mg/L			4030		#DIV/0!	895	454	33900	#DIV/0!	39279		797	0.00125471	-9.2	-0.8		-26.9	-4.55	Texas		Conventional Hydrocarbon
Gulf Coast	Wilcox	Cenozoic	Paleogene	mg/L	88061		2850	53500	#DIV/0!	625	414	30100	#DIV/0!	33989		572	0.00174825	-5.2	-0.8		-6.3	-1.45	Texas		Conventional Hydrocarbon
Gulf Coast	Wilcox	Cenozoic	Paleogene	mg/L	10890			6880	#DIV/0!			4010	#DIV/0!	4010			#DIV/0!	1	-0.7	0.7099	-15.1	-2.61	Texas		Conventional Hydrocarbon
Gulf Coast	Wilcox	Cenozoic	Paleogene	mg/L	4915		10.8	2450	#DIV/0!	30	3	2417	#DIV/0!	2460.8		3.8	0.263158	-7	-4.4		-40	-5.52	Texas		Conventional Hydrocarbon
Gulf Coast	Wilcox	Cenozoic	Paleogene	mg/L	65505	58.6	2300	40300	687.713	520	257	21500	366.894	24577		569	0.00175747	-17	-4.2	0.7123	-27.2	-3.51	Texas		Conventional Hydrocarbon
Gulf Coast	Wilcox	Cenozoic	Paleogene	mg/L	4342		9.2	2200	#DIV/0!	28	2.2	2100	#DIV/0!	2139.4		2.7	0.37037	-13	-4.1		-33	-4.92	Texas		Conventional Hydrocarbon
Gulf Coast	Wilcox	Cenozoic	Paleogene	mg/L	4391		9.2	2200	#DIV/0!	27	2.2	2150	#DIV/0!	2188.4		2.7	0.37037	-15	-3.9	0.7092	-32.5	-4.6	Texas		Conventional Hydrocarbon
Gulf Coast	Wilcox	Cenozoic	Paleogene	mg/L	16600	180	403	10700	59.4444	38	40	5200	28.8889	5681		39	0.025641	-15	-3.8		-26.4	-3.64	Texas		Conventional Hydrocarbon
Gulf Coast	Wilcox	Cenozoic	Paleogene	mg/L	4819	8.4	7	2450	291.667	23	2	2327	277.024	2359		2	0.5	-15	-3.8	0.7082	-62.9	-8.92	Texas		Conventional Hydrocarbon
Gulf Coast	Wilcox	Cenozoic	Paleogene	mg/L			429		#DIV/0!	160	60	13500	#DIV/0!	14149		88	0.0113636	-16	-3.7		-40.3	-6.48	Texas		Conventional Hydrocarbon
Gulf Coast	Wilcox	Cenozoic	Paleogene	mg/L	7457		113	4555	#DIV/0!	11	4.3	2770	#DIV/0!	2898.3		4	0.25	-35	-3.2		-22.6	-3.35	Texas		Conventional Hydrocarbon
Gulf Coast	Wilcox	Cenozoic	Paleogene	mg/L	27893	47	294	16400	348.936	122	60.7	10900	231.915	11376.7		69.3	0.01443	-16	-3.1	0.7085	-27.1	-3.78	Texas		Conventional Hydrocarbon
Gulf Coast	Wilcox	Cenozoic	Paleogene	mg/L	20408	34	109	11400	335.294	97	29.2	8700	255.882	8935.2		39.1	0.0255754	-13	-3.1	0.7089	-36.2	-5.17	Texas		Conventional Hydrocarbon
Gulf Coast	Wilcox	Cenozoic	Paleogene	mg/L	18300			12200	#DIV/0!			6100	#DIV/0!	6100			#DIV/0!	-13	-3.1		-35.2	-4.92	Texas		Conventional Hydrocarbon
Gulf Coast	Wilcox	Cenozoic	Paleogene	mg/L	20829	8	141	12700	1587.5	422	6	7500	937.5	8069		40	0.025		9.2	0.7109			Texas		Conventional Hydrocarbon
Gulf Coast	Wilcox	Cenozoic	Paleogene	mg/L	6073		32	3700	#DIV/0!	20	4.8	2310	#DIV/0!	2366.8		6	0.166667	-16					Texas		Conventional Hydrocarbon
Appalachian	Marcellus	Paleozoic	Devonian, M	mg/L	75900	498	5430	46200	92.7711	206	564	21000	42.1687	27200		953	0.00104932	-39.1	-2.95		-66	-9.97	Pennsylvania		Shale Gas
Appalachian	Marcellus	Paleozoic	Devonian, M	mg/L	71400	444	5030	43900	98.8739	208	535	19700	44.3694	25473		946	0.00105708	-35.9	-2.94		-54.1	-8.39	Pennsylvania		Shale Gas
Appalachian	Marcellus	Paleozoic	Devonian, M	mg/L	42600	283	2910	25700	90.8127	128	268	12400	43.8163	15706		447	0.00223714	-35.4	-2.87		-50.7	-7.63	Pennsylvania		Shale Gas
Appalachian	Marcellus	Paleozoic	Devonian, M	mg/L	78800	492	5630	48200	97.9675	222	589	21800	44.3089	28241		1060	0.000943396	-37.2	-2.83		-53.6	-8.72	Pennsylvania		Shale Gas
Appalachian	Marcellus	Paleozoic	Devonian, M	mg/L	201000	780	19000	117000	150	240	1460	44800	57.4359	65500		5170	0.000193424	-46.5	-2.71		-64.5	-10.05	Pennsylvania		Shale Gas
Appalachian	Marcellus	Paleozoic	Devonian, M	mg/L	87300	568	6400	52400	92.2535	243	686	24400	42.9577	31729		1160	0.000862069	-36.9	-2.69		-55.5	-8.55	Pennsylvania		Shale Gas
Appalachian	Marcellus	Paleozoic	Devonian, M	mg/L	83400	497	6240	50600	101.811	232	633	23100	46.4789	30205		1180	0.000847458	-36.9	-2.67		-41.4	-6.02	Pennsylvania		Shale Gas
Appalachian	Marcellus	Paleozoic	Devonian, M	mg/L	92500	600	6980	55800	93	251	728	25300	42.1667	33259		1270	0.000787402	-38.7	-2.61		-54.5	-7.99	Pennsylvania		Shale Gas
Appalachian	Marcellus	Paleozoic	Devonian, M	mg/L	86400	534	6390	52400	98.1273	228	634	24000	44.9438	31252		1220	0.000819672	-36.6	-2.61		-67.4	-9.89	Pennsylvania		Shale Gas
Appalachian	Marcellus	Paleozoic	Devonian, M	mg/L	96300	617	7430	57400	93.0308	259	785	26700	43.2739	35174		1380	0.000724638	-37.6	-2.57		-53.3	-8.07	Pennsylvania		Shale Gas
Appalachian	Marcellus	Paleozoic	Devonian, M	mg/L	93200	568	6950	57000	100.352	234	668	25300	44.5423	33152		1340	0.000746269	-36.9	-2.54		-45.7	-6.42	Pennsylvania		Shale Gas
Appalachian	Marcellus	Paleozoic	Devonian, M	mg/L	100000	313	6530	63700	203.514	275	776	26000	83.0671	33581		1400	0.000714286	-42.1	-2.53		-45.8	-6.66	Pennsylvania		Shale Gas
Appalachian	Marcellus	Paleozoic	Devonian, M	mg/L	99800	623	7510	61600	98.8764	258	797	26200	42.0546	34765		1480	0.000675676	-37.8	-2.49		-48.9	-7.45	Pennsylvania		Shale Gas
Appalachian	Marcellus	Paleozoic	Devonian, M	mg/L	28500	175	2170	16800	96	178	249	8170	46.6857	10767		468	0.00213675	-43	-5.64		-68.5	-10.22	Pennsylvania		Shale Gas
Appalachian	Marcellus	Paleozoic	Devonian, M	mg/L	108000	581	7900	65000	111.876	247	828	30100	51.8072	39075		1820	0.000549451	-41.9	-2.48		-42.8	-5.88	Pennsylvania		Shale Gas
Appalachian	Marcellus	Paleozoic	Devonian, M	mg/L	102000	650	7960	60500	93.0769	260	819	28300	43.5385	37339		1450	0.000689655	-36.9	-2.48		-51.6	-7.9	Pennsylvania		Shale Gas
Appalachian	Marcellus	Paleozoic	Devonian, M	mg/L	106000	543	7370	67300	123.941	258	866	26800	49.3554	35294		1720	0.000581395	-42.1	-2.47		-57	-8.9	Pennsylvania		Shale Gas
Appalachian	Marcellus	Paleozoic	Devonian, M	mg/L	101000	588	7550	61100	103.912	257	771	27600	46.9388	36178	25.3	1480	0.000675676	-36.6	-2.39		-46.5	-7.3	Pennsylvania		Shale Gas
Appalachian	Marcellus	Paleozoic	Devonian, M	mg/L	60900	399	3810	37000	92.7318	162	378	17600	44.1103	21950		682	0.00146628	-35.1	-2.39		-53	-7.69	Pennsylvania		Shale Gas
Appalachian	Marcellus	Paleozoic	Devonian, M	mg/L	113000	608	7950	71200	117.105	309	762	28300	46.5461	37321		1870	0.000534759	-42.4	-2.38		-54.2	-7.94	Pennsylvania		Shale Gas
Appalachian	Marcellus	Paleozoic	Devonian, M	mg/L	107000	679	8410	64400	94.8454	272	872	29200	43.0044	38754		1540	0.000649351	-37.4	-2.38		-61.4	-9.34	Pennsylvania		Shale Gas
Appalachian	Marcellus	Paleozoic	Devonian, M	mg/L	62500	409	4000	37500	91.687	171	397	18400	44.9878	22968		714	0.00140056	-34.6	-2.38		-59	-9.19	Pennsylvania		Shale Gas
Appalachian	Marcellus	Paleozoic	Devonian, M	mg/L	54600	370	3300	33400	90.2703	146	325	15800	42.7027	19571		594	0.0016835	-34.8	-2.34		-49.8	-7.79	Pennsylvania		Shale Gas
Appalachian	Marcellus	Paleozoic	Devonian, M	mg/L	115000	531	8870	70200	132.203	298	755	30900	58.1921	40823		2010	0.000497512	-42.5	-2.32		-47.8	-7.24	Pennsylvania		Shale Gas
Appalachian	Marcellus	Paleozoic	Devonian, M	mg/L	106000	675	8370	63600	94.2222	263	853	28500	42.2222	37986		1480	0.000675676	-37.5	-2.32		-54.1	-8.15	Pennsylvania		Shale Gas
Appalachian	Marcellus	Paleozoic	Devonian, M	mg/L	258000	1070	25000	146000	136.449	270	1890	52800	49.3458	79960		7700	0.00012987	-49.1	-2.3		-58.7	8.93	Pennsylvania		Shale Gas
Appalachian	Marcellus	Paleozoic	Devonian, M	mg/L	57000	379	3520	34800	91.8206	152	347	16400	43.2718	20419		637	0.00156986	-34.8	-2.29		-52.9	-8.07	Pennsylvania		Shale Gas
Appalachian	Marcellus	Paleozoic	Devonian, M	mg/L	130000	733	8790	81900	111.733	1210	841	32800	44.7476	43641		2420	0.000413223	-42.6	-2.21		-57	-8.55	Pennsylvania		Shale Gas
Appalachian	Marcellus	Paleozoic	Devonian, M	mg/L					#DIV/0!				#DIV/0!	0			#DIV/0!	-43.7	-2.07		-56.7	-8.89	Pennsylvania		Shale Gas
Appalachian	Marcellus	Paleozoic	Devonian, M	mg/L	118000	717	9580	72300	100.837	262	899	30800	42.9568	41541		1970	0.000507614	-36.5	-1.99		-58	-9.02	Pennsylvania		Shale Gas
Appalachian	Marcellus	Paleozoic	Devonian, M	mg/L					#DIV/0!				#DIV/0!	0			#DIV/0!	-42.1	-1.98		-51.9	-7.91	Pennsylvania		Shale Gas
Appalachian	Marcellus	Paleozoic	Devonian, M	mg/L	169000	984	14800	101000	102.642	310	1440	42400	43.0894	58950		3260	0.000306748	-41.9	-1.94		-52.9	-8.33	Pennsylvania		Shale Gas
Appalachian	Marcellus	Paleozoic	Devonian, M	mg/L	135000	668	9630	86500	129.491	308	953	32400	48.503	43291		2280	0.000438596	-42.4	-1.93		-57.3	-8.8	Pennsylvania		Shale Gas
Appalachian	Marcellus	Paleozoic	Devonian, M	mg/L	272000	1040	27700	156000	150	440	1610	56300	54.1346	86050		8100	0.000123457	-44	-1.91		-54.7	-8.2	Pennsylvania		Shale Gas
Appalachian	Marcellus	Paleozoic	Devonian, M	mg/L	140000	655	10400	87700	133.893	311	976	34500	52.6718	46187		2480	0.000403226	-41.6	-1.88		-53.9	-8.24	Pennsylvania		Shale Gas
Appalachian	Marcellus	Paleozoic	Devonian, M	mg/L					#DIV/0!				#DIV/0!	0			#DIV/0!	-42.1	-1.87		-54.7	-8.29	Pennsylvania		Shale Gas
Appalachian	Marcellus	Paleozoic	Devonian, M	mg/L	163000	954	14200	98100	102.83	280	1410	40400	42.348	56290		3130	0.000319489	-40.8	-1.86		-62.7	-9.44	Pennsylvania		Shale Gas
Appalachian	Marcellus	Paleozoic	Devonian, M	mg/L					#DIV/0!				#DIV/0!	0			#DIV/0!	-42.6	-1.85		-58.8	-8.94	Pennsylvania		Shale Gas
Appalachian	Marcellus	Paleozoic	Devonian, M	mg/L	137000	850	11700	82200	96.7059	319	1150	35400	41.6471	48569		2240	0.000446429	-37	-1.83		-56.1	-8.65	Pennsylvania		Shale Gas
Appalachian	Marcellus	Paleozoic	Devonian, M	mg/L	163000	981	14300	99300	101.223	290	1510	40300	41.0805	56400		2890	0.000346021	-40.6	-1.82		-52	-7.91	Pennsylvania		Shale Gas
Appalachian	Marcellus	Paleozoic	Devonian, M	mg/L	161000	945	13800	95300	100.847	320	1410	42300	44.7619	57830		3140	0.000318471	-40	-1.8		-46.9	-7.42	Pennsylvania		Shale Gas
Appalachian	Marcellus	Paleozoic	Devonian, M	mg/L	148000	927	12700	89400	96.4401	311	1280	37200	40.1294	51491		2470	0.000404858	-38.1	-1.79		-59.5	-9.17	Pennsylvania		Shale Gas
Appalachian	Marcellus	Paleozoic	Devonian, M	mg/L	130000	811	10400	80700	99.5068	271	960	32500	40.074	44131		2200	0.000454545	-36.4	-1.79		-68.6	-10.46	Pennsylvania		Shale Gas
Appalachian	Marcellus	Paleozoic	Devonian, M	mg/L					#DIV/0!				#DIV/0!	0			#DIV/0!	-40.7	-1.77		-55.6	-8.68	Pennsylvania		Shale Gas
Appalachian	Marcellus	Paleozoic	Devonian, M	mg/L	167000	975	14500	98900	101.436	281	1170	43800	44.9231	59751		3100	0.000322581	-40.3	-1.72		-53.1	-7.91	Pennsylvania		Shale Gas
Appalachian	Marcellus	Paleozoic	Devonian, M	mg/L	161000	1020	13500	99000	97.0588	251	1160	39200	38.4314	54111		2890	0.000346021	-39.6	-1.71		-60.2	-9.4	Pennsylvania		Shale Gas
Appalachian	Marcellus	Paleozoic	Devonian, M	mg/L	125000	794	12700	66700	84.005	278	1210	37700	47.4811	51888		2720	0.000367647	-38.1	-1.71		-49.4	-7.75	Pennsylvania		Shale Gas
Appalachian	Marcellus	Paleozoic	Devonian, M	mg/L	153000	889	12800	92600	104.162	230	1330	39400	44.3195	53760		2380	0.000420168	-35.7	-1.63		-59.2	-9.15	Pennsylvania		Shale Gas
Appalachian	Marcellus	Paleozoic	Devonian, M	mg/L	155000	951	13450	94450	99.3165	310	1480	37750	39.6951	52990		2770	0.000361011	-39.3	-1.61		-62.1	-9.67	Pennsylvania		Shale Gas
Appalachian	Marcellus	Paleozoic	Devonian, M	mg/L	149000	897	12600	91000	101.449	200	1400	37700	42.029	51900		2110	0.000473934	-35.2	-1.6		-51.3	-8.3	Pennsylvania		Shale Gas
Appalachian	Marcellus	Paleozoic	Devonian, M	mg/L	274000	1430	35400	166000	116.084	510	3550	56900	39.7902	96360		5700	0.000175439	-44.2	-1.54		-60.6	-9.36	Pennsylvania		Shale Gas
Appalachian	Marcellus	Paleozoic	Devonian, M	mg/L	280000	1460	31600	167000	114.384	440	2650	63000	43.1507	97690		7030	0.000142248	-43	-1.53		-63.2	-9.68	Pennsylvania		Shale Gas
Appalachian	Marcellus	Paleozoic	Devonian, M	mg/L	222000	910	19600	128000	140.659	200	1710	50100	55.0549	71610		5600	0.000178571	-41.5	-1.47		-62.7	-9.52	Pennsylvania		Shale Gas
Appalachian	Marcellus	Paleozoic	Devonian, M	mg/L					#DIV/0!				#DIV/0!	0			#DIV/0!	-38.7	-1.39		-60.4	-9.31	Pennsylvania		Shale Gas
Appalachian	Marcellus	Paleozoic	Devonian, M	mg/L	276000	1470	35700	168000	114.286	590	3670	57400	39.0476	97360		5460	0.00018315	-43	-1.28		-63.5	-9.82	Pennsylvania		Shale Gas
Appalachian	Marcellus	Paleozoic	Devonian, M	mg/L	284000	1090	32000	166000	152.294	470	2420	57900	53.1193	92790		7730	0.000129366	-43.2	-1.09		-62.1	-9.45	Pennsylvania		Shale Gas
Appalachian	Marcellus	Paleozoic	Devonian, M	mg/L	301000	1210	34000	176000	145.455	440	2380	57900	47.8512	94720		8940	0.000111857	-44	-0.84		-58.7	-9.18	Pennsylvania		Shale Gas
Appalachian	Marcellus	Paleozoic	Devonian, M	mg/L	289000	1240	29500	168000	135.484	380	2190	60000	48.3871	92070		8120	0.000123153	-41.7	-0.82		-59.9	-9.06	Pennsylvania		Shale Gas
Appalachian	Marcellus	Paleozoic	Devonian, M	mg/L	316000	1400	37100	184000	131.429	430	2730	63100	45.0714	103360		10300	9.70874e-05	-43.9	-0.52		-49.5	-7.43	Pennsylvania		Shale Gas
Appalachian	Marcellus	Paleozoic	Devonian, M	mg/L	302000	1240	39200	180000	145.161	630	2750	60000	48.3871	102580		7420	0.000134771	-43.6	-0.52		-62.6	-9.39	Pennsylvania		Shale Gas
Appalachian	Marcellus	Paleozoic	Devonian, M	mg/L	169197	1081.1	21741	105863	97.9211	243.19	2183	36222	33.5047	60389.2		1624	0.000615764	-30.2	-0.4	0.711432	-56.5	-8.3	Pennsylvania		Shale Gas
Appalachian	Marcellus	Paleozoic	Devonian, M	mg/L	178636	1141.83	22334	112386	98.4264	306.137	2261	38407	33.6364	63308.1		1532	0.000652742			0.711605			Pennsylvania		Shale Gas
Appalachian	Marcellus	Paleozoic	Devonian, M	mg/L	109500		6120	77000	#DIV/0!		538	30400	#DIV/0!	37058		1970	0.000507614			0.710653			Pennsylvania	Shale	Shale Gas
Appalachian	Marcellus	Paleozoic	Devonian, M	mg/L	211400		20800	159000	#DIV/0!		1750	49400	#DIV/0!	71950		5230	0.000191205			0.71027			Pennsylvania	Shale	Shale Gas
Appalachian	Marcellus	Paleozoic	Devonian, M	mg/L	154100		11300	68000	#DIV/0!		1110	41900	#DIV/0!	54310		3340	0.000299401			0.710742			Pennsylvania	Shale	Shale Gas
Appalachian	Marcellus	Paleozoic	Devonian, M	mg/L	136600		7930	77000	#DIV/0!		840	34000	#DIV/0!	42770		2870	0.000348432			0.710757			Pennsylvania	Shale	Shale Gas
Appalachian	Marcellus	Paleozoic	Devonian, M	mg/L	120900		7050	73000	#DIV/0!		726	27600	#DIV/0!	35376		2600	0.000384615			0.710733			Pennsylvania	Shale	Shale Gas
Appalachian	Marcellus	Paleozoic	Devonian, M	mg/L	14800		349		#DIV/0!				#DIV/0!	349		46	0.0217391			0.711992			Pennsylvania	Shale	Shale Gas
Appalachian	Marcellus	Paleozoic	Devonian, M	mg/L	21400		624	10300	#DIV/0!		43	2792	#DIV/0!	3459		88	0.0113636			0.712013			Pennsylvania	Shale	Shale Gas
Appalachian	Marcellus	Paleozoic	Devonian, M	mg/L	44800		2278	29000	#DIV/0!		217	11747	#DIV/0!	14242		381	0.00262467			0.712036			Pennsylvania	Shale	Shale Gas
Appalachian	Marcellus	Paleozoic	Devonian, M	mg/L	51100		288	32200	#DIV/0!		254	14216	#DIV/0!	14758		450	0.00222222			0.712027			Pennsylvania	Shale	Shale Gas
Appalachian	Marcellus	Paleozoic	Devonian, M	mg/L	65700		3938	42000	#DIV/0!		381	18288	#DIV/0!	22607		651	0.0015361			0.712044			Pennsylvania	Shale	Shale Gas
Appalachian	Marcellus	Paleozoic	Devonian, M	mg/L	81200		5603	47900	#DIV/0!		518	23928	#DIV/0!	30049		934	0.00107066			0.712013			Pennsylvania	Shale	Shale Gas
Appalachian	Marcellus	Paleozoic	Devonian, M	mg/L	89500		6292	53500	#DIV/0!		629	24820	#DIV/0!	31741		1127	0.000887311			0.712019			Pennsylvania	Shale	Shale Gas
Appalachian	Marcellus	Paleozoic	Devonian, M	mg/L	99000		9236	76600	#DIV/0!		671	26297	#DIV/0!	36204		1215	0.000823045			0.712091			Pennsylvania	Shale	Shale Gas
Appalachian	Marcellus	Paleozoic	Devonian, M	mg/L	33300		1239	79000	#DIV/0!		694	9901	#DIV/0!	11834		214	0.0046729			0.712076			Pennsylvania	Shale	Shale Gas
Appalachian	Marcellus	Paleozoic	Devonian, M	mg/L	55600		2782	30600	#DIV/0!		376	16704	#DIV/0!	19862		533	0.00187617			0.712108			Pennsylvania	Shale	Shale Gas
Appalachian	Marcellus	Paleozoic	Devonian, M	mg/L	69400		3900	40700	#DIV/0!		490	18288	#DIV/0!	22678		738	0.00135501			0.712088			Pennsylvania	Shale	Shale Gas
Appalachian	Marcellus	Paleozoic	Devonian, M	mg/L	78400		4627	46800	#DIV/0!		559	18510	#DIV/0!	23696		900	0.00111111			0.712108			Pennsylvania	Shale	Shale Gas
Appalachian	Marcellus	Paleozoic	Devonian, M	mg/L	89300		5749	71100	#DIV/0!		211	22437	#DIV/0!	28397		1063	0.000940734			0.712117			Pennsylvania	Shale	Shale Gas
Appalachian	Marcellus	Paleozoic	Devonian, M	mg/L	98100		6278		#DIV/0!				#DIV/0!	6278		1380	0.000724638			0.712113			Pennsylvania	Shale	Shale Gas
Appalachian	Marcellus	Paleozoic	Devonian, M	mg/L	136200		12278	88500	#DIV/0!		1267	32500	#DIV/0!	46045		1393	0.000717875			0.711129			Pennsylvania	Shale	Shale Gas
Appalachian	Marcellus	Paleozoic	Devonian, M	mg/L	146700		14028	102100	#DIV/0!		1478	35070	#DIV/0!	50576		1694	0.000590319			0.710988			Pennsylvania	Shale	Shale Gas
Appalachian	Marcellus	Paleozoic	Devonian, M	mg/L	153400		15269	107300	#DIV/0!		1632	37100	#DIV/0!	54001		1832	0.000545852						Pennsylvania	Shale	Shale Gas
Appalachian	Marcellus	Paleozoic	Devonian, M	mg/L	156700		15875	102600	#DIV/0!		1671	38530	#DIV/0!	56076		1872	0.000534188			0.711056			Pennsylvania	Shale	Shale Gas
Appalachian	Marcellus	Paleozoic	Devonian, M	mg/L	167800		16509	115300	#DIV/0!		1820	40350	#DIV/0!	58679		1888	0.000529661			0.711088			Pennsylvania	Shale	Shale Gas
Appalachian	Marcellus	Paleozoic	Devonian, M	mg/L	168400		17612	116100	#DIV/0!		1896	46260	#DIV/0!	65768		2045	0.000488998			0.711021			Pennsylvania	Shale	Shale Gas
Appalachian	Marcellus	Paleozoic	Devonian, M	mg/L	169400		18080		#DIV/0!		1992	47881	#DIV/0!	67953		2151	0.0004649			0.711076			Pennsylvania	Shale	Shale Gas
Appalachian	Marcellus	Paleozoic	Devonian, M	mg/L	108000		8682	59600	#DIV/0!		880	20310	#DIV/0!	29872		1192	0.000838926			0.71088			Pennsylvania	Shale	Shale Gas
Appalachian	Marcellus	Paleozoic	Devonian, M	mg/L	117000		8796	65300	#DIV/0!		890	20440	#DIV/0!	30126		1205	0.000829876			0.710905			Pennsylvania	Shale	Shale Gas
Appalachian	Marcellus	Paleozoic	Devonian, M	mg/L	110700		8779	59400	#DIV/0!		859	20510	#DIV/0!	30148		1277	0.000783085			0.710969			Pennsylvania	Shale	Shale Gas
Appalachian	Marcellus	Paleozoic	Devonian, M	mg/L	108000		8818	58700	#DIV/0!		866	20910	#DIV/0!	30594		1296	0.000771605			0.710954			Pennsylvania	Shale	Shale Gas
Appalachian	Marcellus	Paleozoic	Devonian, M	mg/L	71400		5674	36700	#DIV/0!		570	12890	#DIV/0!	19134		795	0.00125786			0.710737			Pennsylvania	Shale	Shale Gas
Appalachian	Marcellus	Paleozoic	Devonian, M	mg/L	71400		5733	36800	#DIV/0!		589	12940	#DIV/0!	19262		803	0.00124533			0.710722			Pennsylvania	Shale	Shale Gas
Appalachian	Marcellus	Paleozoic	Devonian, M	mg/L	127200		6532	63700	#DIV/0!		776	26020	#DIV/0!	33328		1397	0.00071582			0.710988			Pennsylvania	Shale	Shale Gas
Appalachian	Marcellus	Paleozoic	Devonian, M	mg/L	138800		7903	65000	#DIV/0!		828	30100	#DIV/0!	38831		1823	0.000548546			0.710976			Pennsylvania	Shale	Shale Gas
Appalachian	Marcellus	Paleozoic	Devonian, M	mg/L	137800		7372	67300	#DIV/0!		866	26840	#DIV/0!	35078		1721	0.000581058			0.710957			Pennsylvania	Shale	Shale Gas
Appalachian	Marcellus	Paleozoic	Devonian, M	mg/L	146200		8874	70200	#DIV/0!		755	30910	#DIV/0!	40539		2009	0.00049776			0.710961			Pennsylvania	Shale	Shale Gas
Appalachian	Marcellus	Paleozoic	Devonian, M	mg/L	143100		7952	71200	#DIV/0!		762	28270	#DIV/0!	36984		1868	0.000535332			0.710975			Pennsylvania	Shale	Shale Gas
Appalachian	Marcellus	Paleozoic	Devonian, M	mg/L	157000		8786	81900	#DIV/0!		841	32800	#DIV/0!	42427		2415	0.000414079			0.710148			Pennsylvania	Shale	Shale Gas
Appalachian	Marcellus	Paleozoic	Devonian, M	mg/L	161500		9634	86500	#DIV/0!		953	32380	#DIV/0!	42967		2275	0.00043956			0.71116			Pennsylvania	Shale	Shale Gas
Appalachian	Marcellus	Paleozoic	Devonian, M	mg/L	188200		10390	87700	#DIV/0!		976	34520	#DIV/0!	45886		2525	0.00039604			0.711173			Pennsylvania	Shale	Shale Gas
Appalachian	Marcellus	Paleozoic	Devonian, M	mg/L					#DIV/0!				#DIV/0!	0			#DIV/0!			0.711183			Pennsylvania	Shale	Shale Gas
Appalachian	Marcellus	Paleozoic	Devonian, M	mg/L	154000	979	13800	92300	94.2799	221	1260	39100	39.9387	54381		2720	0.000367647								Shale Gas
Williston	Bakken	Paleozoic	Devonian	mg/L	318885	590	11300	192736	326.671	5370	1380	106600	180.678	124650	321	752	0.00132979	-17	9.5		-131.9	-16.83	Montana		Tight Oil
Williston	Bakken	Paleozoic	Devonian	mg/L			9120		#DIV/0!	5300	1220	116000	#DIV/0!	131640	324	600	0.00166667	-16	11.6						Tight Oil
Williston	Bakken	Paleozoic	Devonian	mg/L	128124	292	7200	76682	262.61	2540	611	39920	136.712	50271	224	476	0.00210084	-102	-10	0.71028	-127.9	-15.61	Montana		Tight Oil
Williston	Bakken	Paleozoic	Devonian	mg/L	248346	161	4860	147861	918.391	4180	623	90270	560.683	99933	728	265	0.00377358	-109	-9.2		-127.6	-15.58	Montana		Tight Oil
Williston	Bakken	Paleozoic	Devonian	mg/L	207686	456	11600	124875	273.849	4460	994	64068	140.5	81122	292	773	0.00129366	-58	-0.1	0.71037	-134.1	-16.39	Montana		Tight Oil
Williston	Bakken	Paleozoic	Devonian	mg/L	282825	630	12100	170988	271.41	5160	1420	91053	144.529	109733	306	727	0.00137552	-4	11.1		-128.9	-17.05	North Dakota		Tight Oil
Williston	Bakken	Paleozoic	Devonian	mg/L	313754	753	18200	189895	252.185	5500	1530	96472	128.117	121702	330	1210	0.000826446	-19	5.5	0.71012	-164.9	-21.41	North Dakota		Tight Oil
Williston	Bakken	Paleozoic	Devonian	mg/L	309209	716	17600	188252	262.922	5310	1450	94091	131.412	118451	425	1160	0.000862069	-22	5	0.71004	-87.5	-10.07	North Dakota		Tight Oil
Williston	Bakken	Paleozoic	Devonian	mg/L	308167	934	19800	188910	202.259	6370	1530	88814	95.0899	116514	284	1390	0.000719424	-17	7.8		-124.1	-15.39	North Dakota		Tight Oil
Williston	Bakken	Paleozoic	Devonian	mg/L	338868	770	24400	203814	264.694	7150	1770	98647	128.113	131967	260	1820	0.000549451	-14	7.8	0.71038	-125.7	-15.37	North Dakota		Tight Oil
Williston	Bakken	Paleozoic	Devonian	mg/L	246292	425	8110	150353	353.772	4020	1180	80790	190.094	94100	336	484	0.00206612	-24	6.1		-81	-8.59	North Dakota		Tight Oil
Williston	Bakken	Paleozoic	Devonian	mg/L	309081	706	20800	187225	265.191	6220	1780	90597	128.324	119397	277	1560	0.000641026	-17	7.2	0.71027	-124.7	-15.63	North Dakota		Tight Oil
Williston	Bakken	Paleozoic	Devonian	mg/L	289586	827	15700	175407	212.1	6110	1710	87878	106.261	111398	327	1070	0.000934579	-14	8.2	0.70851	-122.5	-15.35	North Dakota		Tight Oil
Wind River	Lance	Unknown	Unknown	mg/L	4118		3.3	483	#DIV/0!	11.1	0.9	1029.6	#DIV/0!	1044.9	0.47	0.596	1.67785	-81.4	-5.97	0.71062	-127.3	-16.84	Wyoming		Tight Gas
Wind River	Lance	Unknown	Unknown	mg/L	4429	2.34186	7	546	233.148	18	1	1159	494.907	1185		0.863194	1.15849	-74.9	-4.77	0.710746	-130.3	-17.01	Wyoming		Tight Gas
Wind River	Lance	Unknown	Unknown	mg/L	4915		5.8	815	#DIV/0!	10.6	1.1	1188.6	#DIV/0!	1206.1	0.79	0.808	1.23762	-73.7	-4.35	0.71062	-120.9	-15.38	Wyoming		Tight Gas
Wind River	Lance	Unknown	Unknown	mg/L	5426	2.56324	34	443	172.828	15	7	1565	610.556	1621	1	1.32709	0.753529	-73.4	-5.91	0.710514	-124.4	-16.44	Wyoming		Tight Gas
Green River	Lance	Unknown	Unknown	mg/L	11711	56.8	104	5600	98.5915	52	9	3046	53.6268	3211	18	7.05273	0.141789	-80	-3.12	0.71229	-135	-18.07	Wyoming		Tight Gas
Green River	Lance	Unknown	Unknown	mg/L	11510	54	57	5379	99.6111	26	6	2986	55.2963	3075	16	4.89293	0.204377	-76.6	-2.93	0.71287	-135.2	-18.08	Wyoming		Tight Gas
Green River	Lance	Unknown	Unknown	mg/L	11510	54	57	5379	99.6111	26	6	2986	55.2963	3075	16	4.89293	0.204377	-76.6	-2.93	0.71287	-136	-18.3	Wyoming		Tight Gas
Green River	Lance	Unknown	Unknown	mg/L	10090	24.7	340	4285	173.482	169	16	2378	96.2753	2903	8	7.03169	0.142213	-75.7	-2.76	0.712688	-131.4	-17.32	Wyoming		Tight Gas
Green River	Lance	Unknown	Unknown	mg/L	11681	55.6	73	5450	98.0216	24	6	3169	56.9964	3272	10	5.23628	0.190975	-77.3	-2.3	0.713319	-136	-18.33	Wyoming		Tight Gas
Green River	Lance	Unknown	Unknown	mg/L	13134	66	69	6692	101.394	33	7	3708	56.1818	3817	10	6.8981	0.144968	-76.1	-2.07	0.713223	-129.1	-17.11	Wyoming		Tight Gas
Green River	Lance	Unknown	Unknown	mg/L	11933	56	66	5622	100.393	31	6	3197	57.0893	3300	9	5.39275	0.185434	-73.9	-2.06	0.713279	-130.1	-17.15	Wyoming		Tight Gas
Green River	Lance	Unknown	Unknown	mg/L	11933	56	66	5622	100.393	31	6	3197	57.0893	3300	9	5.39275	0.185434	-73.9	-2.06	0.713279	-126.9	-16.42	Wyoming		Tight Gas
Green River	Lance	Unknown	Unknown	mg/L	12429	62.3	71	6099	97.8973	30	6	3407	54.687	3514	5	6.00002	0.166666	-73.8	-1.61	0.713347	-125.3	-15.99	Wyoming		Tight Gas
Green River	Lance	Unknown	Unknown	mg/L	10936	41.7649	541	5207	124.674	56	5	2681	64.1927	3283		12.2285	0.0817759	-67.6	-1.31	0.710048	-128.2	-16.95	Wyoming		Tight Gas
Green River	Lance	Unknown	Unknown	mg/L	12146	61.9	71	5935	95.8805	21	7	3319	53.6187	3418	5	7.05737	0.141696	-68.9	-1.08	0.713001	-126.7	-16.47	Wyoming		Tight Gas
Green River	Lance	Unknown	Unknown	mg/L	12439	55.3	93	5875	106.239	127	11	3209	58.0289	3440	4	8.72026	0.114676	-70.3	-0.36	0.712453	-118	-15.05	Wyoming		Tight Gas
Green River	Lance	Unknown	Unknown	mg/L	12519	54.5	121	5861	107.541	118	11	3281	60.2018	3531	6	8.0679	0.123948	-70.4	-0.1	0.712554	-122.9	-15.65	Wyoming		Tight Gas
Green River	Lance	Unknown	Unknown	mg/L	11923	56.2	56	5729	101.94	27	6	3258	57.9715	3347	10	5.39099	0.185495	-74.5	-2.23	0.713142	-131.5	-17.06	Wyoming		Tight Gas
Green River	Lance	Unknown	Unknown	mg/L	10886	39.9	83	4630	116.04	33	6	2626	65.8145	2748	39	4.60579	0.217118	-83.7	-3.85	0.713197	-122.5	-15.8	Wyoming		Tight Gas
Green River	Lance	Unknown	Unknown	mg/L	10725	46.9	60	4722	100.682	35	5	2777	59.2111	2877	22	4.28378	0.233439	-81.5	-3.37	0.713515	-134.1	-18.13	Wyoming		Tight Gas
Green River	Lance	Unknown	Unknown	mg/L	21395		34486.8	64313	#DIV/0!	1488.3	90.8	3594	#DIV/0!	39659.9	19.45	393.37	0.00254214	-81	-5.39	0.708145	-125.1	-15.74	Wyoming		Tight Gas
Green River	Mesaverde	Unknown	Unknown	mg/L	125		6		#DIV/0!	7	1	12	#DIV/0!	26		0.0975089	10.2555	-64.5	-9.16	0.718257	-137.1	-17.93	Wyoming		Tight Gas
Green River	Mesaverde	Unknown	Unknown	mg/L	2142	7.31279	10	484	66.1854	12	1	600	82.0481	623	3	0.291244	3.43355	-62	-8.8	0.716237	-137.8	-18.31	Wyoming		Tight Gas
Green River	Mesaverde	Unknown	Unknown	mg/L	4429	21.1847	13	1307	61.6954	17	1	1475	69.6257	1506	25	0.268203	3.72852	-57.4	-8.18	0.716837	-136.4	-17.96	Wyoming		Tight Gas
Green River	Mesaverde	Unknown	Unknown	mg/L	4459	18.4204	9	1328	72.0939	22	1	1369	74.3197	1401	17	0.404019	2.47513	-79.9	-8.07	0.715247	-129.6	-16.79	Wyoming		Tight Gas
Green River	Mesaverde	Unknown	Unknown	mg/L	4369	13.9976	19	1171	83.6573	18	3	1316	94.0163	1356	20	1.76943	0.565154	-61.4	-8.07	0.716394	-128.8	-16.55	Wyoming		Tight Gas
Green River	Mesaverde	Unknown	Unknown	mg/L	8814	45.4826	53	3430	75.4134	43	5	3079	67.6962	3180	12	3.93085	0.254398	-55.9	-7.77	0.717065	-132.1	-16.94	Wyoming		Tight Gas
Green River	Mesaverde	Unknown	Unknown	mg/L	4509	25.2953	19	1803	71.278	15	5	1761	69.6176	1800	33	0.332139	3.01079	-80.1	-7.49	0.716015	-125.1	-15.97	Wyoming		Tight Gas
Green River	Mesaverde	Unknown	Unknown	mg/L	7480	19.7167	162	4363	221.285	35	26	2971	150.685	3194		8.85836	0.112888	-78.1	-7.38	0.713265	-123.5	-15.52	Wyoming		Tight Gas
Green River	Mesaverde	Unknown	Unknown	mg/L	3313	13.1478	11	977	74.3088	26	2	1064	80.9259	1103	8	0.362596	2.75789	-60.7	-7.24	0.716769	-132	-17.41	Wyoming		Tight Gas
Green River	Mesaverde	Unknown	Unknown	mg/L	7490	33.3121	15	2342	70.3048	25	4	2642	79.3106	2686	15	0.712285	1.40393	-45.6	-6.8	0.718333	-126.3	-16.04	Wyoming		Tight Gas
Green River	Mesaverde	Unknown	Unknown	mg/L	11752	66.6419	97	4877	73.1822	50	5	4635	69.5509	4787	15	3.33187	0.300132	-51.6	-6.29	0.718081	-127.8	-16.51	Wyoming		Tight Gas
Green River	Mesaverde	Unknown	Unknown	mg/L	8442	40.1115	18	3053	76.1128	38	5	2975	74.1683	3036	13	0.814949	1.22707	-50.3	-6.28	0.717299	-126.7	-16.24	Wyoming		Tight Gas
Green River	Mesaverde	Unknown	Unknown	mg/L	8603	44.9701	175	3146	69.9575	39	9	2824	62.7972	3047	7	1.18036	0.847197	-45.8	-5.93	0.717554	-128.9	-16.88	Wyoming		Tight Gas
Green River	Mesaverde	Unknown	Unknown	mg/L	8975	40.5805	28	2976	73.3356	42	7	3293	81.1473	3370	82	1.63116	0.613062	-44.3	-5.68	0.7186	-118.3	-14.95	Wyoming		Tight Gas
Green River	Mesaverde	Unknown	Unknown	mg/L	10634	56.5419	64	4037	71.3984	57	8	3896	68.9047	4025	17	3.47289	0.287945	-49.7	-5.28	0.717394	-125.7	-16.53	Wyoming		Tight Gas
Green River	Mesaverde	Unknown	Unknown	mg/L	9165	46.6651	43	3454	74.0168	42	12	3059	65.5522	3156	8	1.92049	0.5207	-46.4	-5.23	0.718337	-131.3	-17.15	Wyoming		Tight Gas
Green River	Mesaverde	Unknown	Unknown	mg/L	8301	38.3313	47	2765	72.1343	47	12	2880	75.1344	2986	7	4.03751	0.247677	-45.3	-5.23	0.718168	-117.4	-14.93	Wyoming		Tight Gas
Green River	Mesaverde	Unknown	Unknown	mg/L	10221	50.9166	64	3735	73.3553	58	8	3814	74.9069	3944	12	2.20471	0.453575	-49.1	-5.21	0.717968	-128.6	-16.87	Wyoming		Tight Gas
Green River	Mesaverde	Unknown	Unknown	mg/L	9215	52.9891	30	3945	74.4493	73	7	3170	59.8236	3280	13	1.06986	0.9347	-48	-5.09	0.716637	-126.9	-16.51	Wyoming		Tight Gas
Green River	Mesaverde	Unknown	Unknown	mg/L	10372	57.2439	38	3816	66.6621	63	7	3882	67.8151	3990	13	1.71379	0.583502	-46.7	-4.78	0.716445	-131.7	-17.29	Wyoming		Tight Gas
Green River	Mesaverde	Unknown	Unknown	mg/L	11258	62.2341	127	4564	73.3359	76	10	3981	63.9681	4194	24	2.45573	0.407211	-39.8	-4.66	0.716361	-118.8	-15.57	Wyoming		Tight Gas
Green River	Mesaverde	Unknown	Unknown	mg/L	13316	88.6302	74	6372	71.8942	80	22	5033	56.7865	5209		1.70109	0.587857	-44.8	-4.31	0.718986	-121.9	-15.28	Wyoming		Tight Gas
Green River	Mesaverde	Unknown	Unknown	mg/L	8542	39.9709	26	2785	69.6757	33	6	3031	75.8302	3096	13	0.686861	1.4559	-42.9	-4.05	0.718162	-117.4	-14.96	Wyoming		Tight Gas
Green River	Mesaverde	Unknown	Unknown	mg/L	13427	86.2583	92	6479	75.1116	44	16	4939	57.2582	5091	3	3.27983	0.304894	-48.4	-4.01	0.718436	-119.6	-15.12	Wyoming		Tight Gas
Green River	Mesaverde	Unknown	Unknown	mg/L	7319	50.6733	13	2561	50.5394	38	3	2614	51.5853	2668	17	2.26044	0.442391	-42.5	-4	0.712046	-123.6	-15.74	Wyoming		Tight Gas
Green River	Mesaverde	Unknown	Unknown	mg/L	10241	52.6641	41	3897	73.9973	42	11	3421	64.9589	3515	4	1.66753	0.59969	-40	-4	0.717563	-122	-15.78	Wyoming		Tight Gas
Green River	Mesaverde	Unknown	Unknown	mg/L	11399	62.1168	165	5137	82.699	98	11	4476	72.0578	4750	6	2.80202	0.356885	-39.5	-4	0.719204	-120.5	-15.92	Wyoming		Tight Gas
Green River	Mesaverde	Unknown	Unknown	mg/L	11923	70.0781	45	5192	74.0888	61	9	4463	63.6861	4578	14	2.20935	0.452623	-42.6	-3.87	0.718956	-121.4	-15.86	Wyoming		Tight Gas
Green River	Mesaverde	Unknown	Unknown	mg/L	10130	49.9973	29	3708	74.164	44	10	3857	77.1442	3940	11	0.675991	1.47931	-41.8	-3.74	0.719971	-134.1	-18.06	Wyoming		Tight Gas
Green River	Mesaverde	Unknown	Unknown	mg/L	6058	15.4131	32	1111	72.0816	36	5	2336	151.56	2409	12	4.2765	0.233836	-37.6	-3.65	0.72016	-135.4	-18.32	Wyoming		Tight Gas
Green River	Mesaverde	Unknown	Unknown	mg/L	5677	14.5126	16	1240	85.4429	21	3	1984	136.709	2024	16	1.08879	0.918448	-39.7	-3.57	0.718648	-133.4	-18.01	Wyoming		Tight Gas
Green River	Mesaverde	Unknown	Unknown	mg/L	7098	25.6769	19	1802	70.1798	31	4	2553	99.4279	2607		0.980473	1.01992	-39.3	-3.48	0.717539	-135.2	-18.15	Wyoming		Tight Gas
Green River	Mesaverde	Unknown	Unknown	mg/L	9195	44.0903	22	3338	75.7082	32	8	3552	80.5619	3614	9	1.47641	0.677319	-40.1	-3.28	0.717765	-135.6	-18.22	Wyoming		Tight Gas
Green River	Mesaverde	Unknown	Unknown	mg/L	8251	33.2099	26	2428	73.1107	31	7	2946	88.7084	3010	12	0.689289	1.45077	-44.3	-3.15	0.71654	-134	-18.13	Wyoming		Tight Gas
Green River	Mesaverde	Unknown	Unknown	mg/L	6078	15.9153	9	1283	80.6144	24	3	2243	140.934	2279	15	0.87713	1.14008	-38.9	-3.1	0.717701	-134.1	-18.07	Wyoming		Tight Gas
Green River	Mesaverde	Unknown	Unknown	mg/L	12640	75.3688	45	5917	78.5073	35	10	4737	62.8509	4827	4	2.32455	0.430191	-42.4	-3.08	0.717637	-133.6	-18.07	Wyoming		Tight Gas
Green River	Mesaverde	Unknown	Unknown	mg/L	10563	40.2	69	4518	112.388	26	5	2639	65.6468	2739	24	4.30425	0.232329	-82.4	-2.83	0.713044	-135.9	-18.16	Wyoming		Tight Gas
Green River	Mesaverde	Unknown	Unknown	mg/L	12398	66.9	74	6231	93.139	24	7	3410	50.9716	3515	3	6.90489	0.144825	-74.5	-2.22	0.71312	-126.5	-16.51	Wyoming		Tight Gas
Green River	Mesaverde	Unknown	Unknown	mg/L	12237	60	71	5974	99.5667	28	8	3352	55.8667	3459	9	6.79586	0.147148	-72.1	-2.19	0.712598	-121.3	-15.61	Wyoming		Tight Gas
Green River	Mesaverde	Unknown	Unknown	mg/L	11379	47.7	78	5259	110.252	68	6	2972	62.3061	3124	1	6.01218	0.166329	-84.1	-4.25	0.713009	-121	-15.31	Wyoming		Tight Gas
Green River	Mesaverde	Unknown	Unknown	mg/L	9547	41.1	63	4337	105.523	25	6	2426	59.0268	2520	3	5.96068	0.167766	-89.6	-4.05	0.713033	-119.1	-14.98	Wyoming		Tight Gas
Green River	Mesaverde	Unknown	Unknown	mg/L	13275	71.6	113	6412	89.5531	41	10	3346	46.7318	3510	36	8.26972	0.120923	-81.2	-1.92	0.712339	-127.5	-16.71	Wyoming		Tight Gas
Green River	Mesaverde	Unknown	Unknown	mg/L	12368	62.6	53	5998	95.8147	25	6	3422	54.6645	3506	7	6.14404	0.162759	-74.3	-1.89	0.712996	-126.7	-16.51	Wyoming		Tight Gas
Green River	Mesaverde	Unknown	Unknown	mg/L	11409	53.6	77	5542	103.396	35	7	3061	57.1082	3180		6.95952	0.143688	-79.4	-3.59	0.71279	-135.7	-18.27	Wyoming		Tight Gas
Green River	Mesaverde	Unknown	Unknown	mg/L	10543	41.2	84	4815	116.869	58	9	2580	62.6214	2731	17	6.36255	0.15717	-94.4	-7.68	0.712457	-126.9	-16.15	Wyoming		Tight Gas
Green River	Mesaverde	Unknown	Unknown	mg/L	8542	24.8	46	3264	131.613	38	5	2039	82.2177	2128	16	3.22144	0.31042	-82	-3.28	0.712825	-135.1	-18.2	Wyoming		Tight Gas
									#DIV/0!				#DIV/0!	0			#DIV/0!
									#DIV/0!				#DIV/0!	0			#DIV/0!
									#DIV/0!				#DIV/0!	0			#DIV/0!
