# Supplementary material for: Understanding controls on the geochemistry of hydrocarbon produced waters from different basins across the US
Source: Royal Society of Chemistry journal article supplement (doi:10.1039/d0em00388c), 2020-12-15
Supplement: d0em00388c4.pdf [file d0em00388c4.pdf]

**Supplementary Table. 1: Analysis of the differences in TDS between the categories with a confidence interval of 95%. Pr values < 0.05 indicate the samples are statistically different, and Pr values  $\geq$  0.05 indicate the samples are statistically not different (marked in red)**

| Contrast                    | Difference      | Standardized difference | Critical value | Pr > Diff        | Significant |
|-----------------------------|-----------------|-------------------------|----------------|------------------|-------------|
| Bakken vs Mesaverde         | 266207.21       | 15.66                   | 2.96           | <b>&lt;0.001</b> | Yes         |
| Bakken vs Lance             | 264221.54       | 13.92                   | 2.96           | <b>&lt;0.001</b> | Yes         |
| Bakken vs Wilcox            | 237635.95       | 14.62                   | 2.96           | <b>&lt;0.001</b> | Yes         |
| Bakken vs Marcellus         | 141883.71       | 8.84                    | 2.96           | <b>&lt;0.001</b> | Yes         |
| Bakken vs Edwards           | 135798.99       | 8.26                    | 2.96           | <b>&lt;0.001</b> | Yes         |
| Bakken vs Trenton           | 60322.58        | 3.58                    | 2.96           | <b>0.01</b>      | Yes         |
| Trenton vs Mesaverde        | 205884.63       | 19.21                   | 2.96           | <b>&lt;0.001</b> | Yes         |
| Trenton vs Lance            | 203898.95       | 14.95                   | 2.96           | <b>&lt;0.001</b> | Yes         |
| Trenton vs Wilcox           | 177313.37       | 18.71                   | 2.96           | <b>&lt;0.001</b> | Yes         |
| Trenton vs Marcellus        | 81561.12        | 8.93                    | 2.96           | <b>&lt;0.001</b> | Yes         |
| Trenton vs Edwards          | 75476.40        | 7.70                    | 2.96           | <b>&lt;0.001</b> | Yes         |
| Edwards vs Mesaverde        | 130408.23       | 12.98                   | 2.96           | <b>&lt;0.001</b> | Yes         |
| Edwards vs Lance            | 128422.55       | 9.79                    | 2.96           | <b>&lt;0.001</b> | Yes         |
| Edwards vs Wilcox           | 101836.96       | 11.69                   | 2.96           | <b>&lt;0.001</b> | Yes         |
| <b>Edwards vs Marcellus</b> | <b>6084.72</b>  | <b>0.73</b>             | <b>2.96</b>    | <b>0.99</b>      | <b>No</b>   |
| Marcellus vs Mesaverde      | 124323.51       | 13.24                   | 2.96           | <b>&lt;0.001</b> | Yes         |
| Marcellus vs Lance          | 122337.83       | 9.69                    | 2.96           | <b>&lt;0.001</b> | Yes         |
| Marcellus vs Wilcox         | 95752.24        | 12.05                   | 2.96           | <b>&lt;0.001</b> | Yes         |
| <b>Wilcox vs Mesaverde</b>  | <b>28571.26</b> | <b>2.94</b>             | <b>2.96</b>    | <b>0.054</b>     | <b>No</b>   |
| <b>Wilcox vs Lance</b>      | <b>26585.59</b> | <b>2.06</b>             | <b>2.96</b>    | <b>0.38</b>      | <b>No</b>   |
| <b>Lance vs Mesaverde</b>   | <b>1985.68</b>  | <b>0.14</b>             | <b>2.96</b>    | <b>1.00</b>      | <b>No</b>   |
| Tukey's d critical value:   |                 |                         | 4.19           |                  |             |
